# Supplementary material
Source: Springer Nature journal article supplement (https://www.springermedizin.de/resource/supplementary/12965_2009_75_MOESM2_ESM.pdf/9573066)

a)

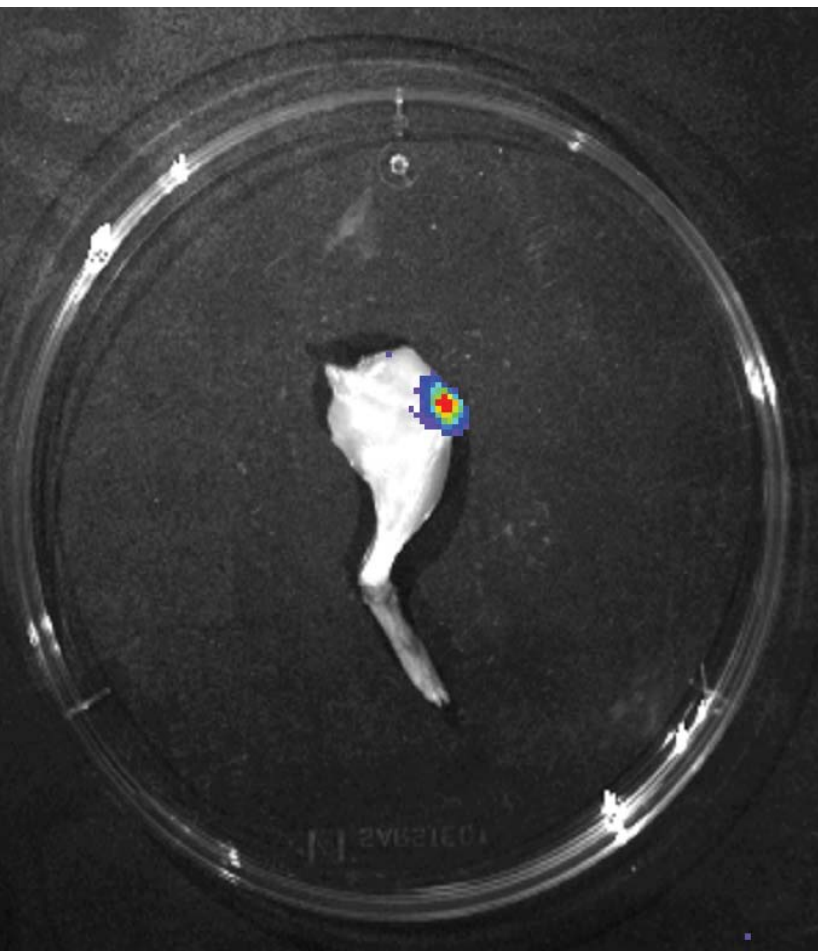

Image  
Min = -4544.7  
Max = 52115  
p/sec/cm<sup>2</sup>/sr

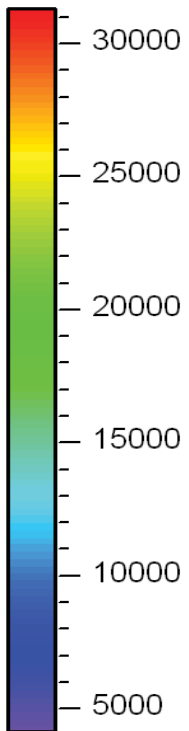

Color Bar  
Min = 4239.7  
Max = 31197

b)

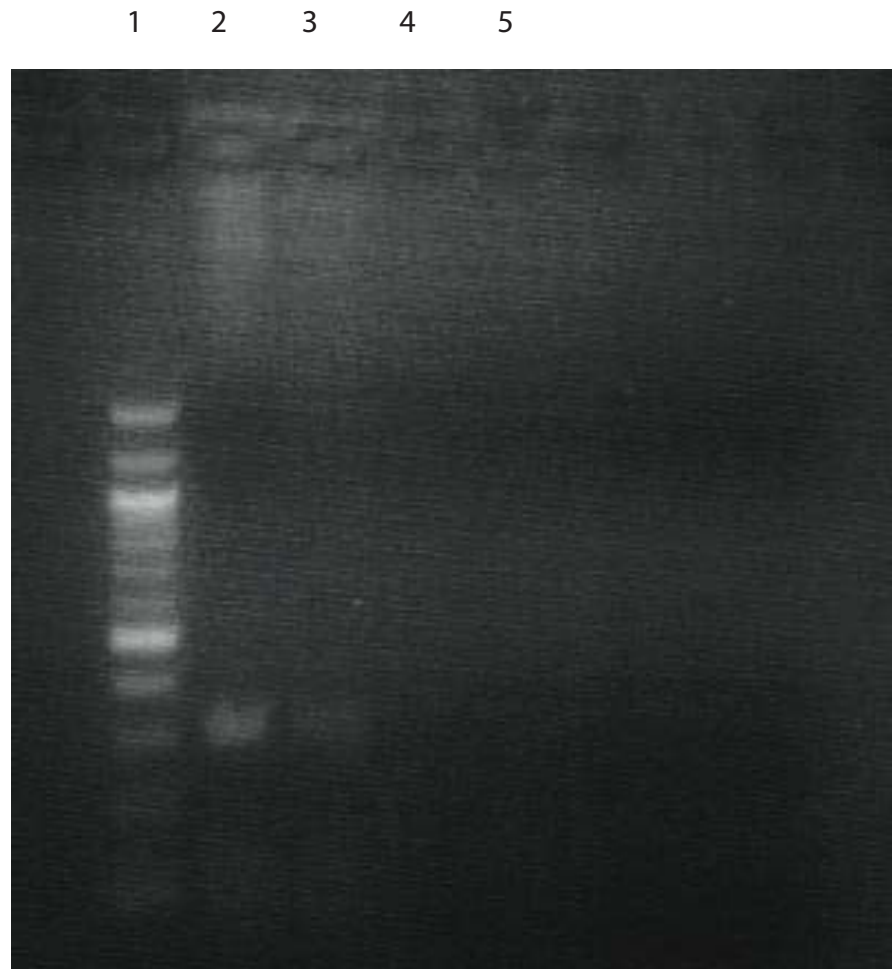

Supplement: MOESM2 [file 9573066]
